# Supplementary material for: Nanoscale heterogeneity in thermoelectrics: the occurrence of phase separation in Fe-doped Ca3Co4O9
Source: Royal Society of Chemistry journal article supplement (doi:10.1039/c6cp00819d), 2016-01-01
Supplement: c6cp00819d1.pdf [file c6cp00819d1.pdf]

Supplementary materials for

**Nanoscale heterogeneity in thermoelectrics: the occurrence of a  
phase separation in Fe-doped  $\text{Ca}_3\text{Co}_4\text{O}_9$**

Wei Xu,<sup>\*ab</sup> Sajid Butt,<sup>cd</sup> Yingcai Zhu,<sup>a</sup> Jing Zhou,<sup>e</sup> Yong Liu,<sup>f</sup> Meijuan Yu,<sup>a</sup>  
Augusto Marcelli,<sup>bg</sup> Jinle Lan,<sup>h</sup> Yuan-Hua Lin<sup>c</sup> and Ce-Wen Nan<sup>\*c</sup>

- (1) Theoretical XANES calculations of this layered structure at the Ca and Co *K*-edge and their derivative spectra
- (2) Theoretical polarized XANES calculations of this layered structure at the Ca and Co *K*-edge and their derivative spectra
- (3) Total energy calculations
- (4) Electronic band structure of the pure and Fe doped  $\text{Ca}_3\text{Co}_4\text{O}_9$

(1) Theoretical XANES calculations of this layered structure at the Ca and Co *K*-edge and their derivative spectra

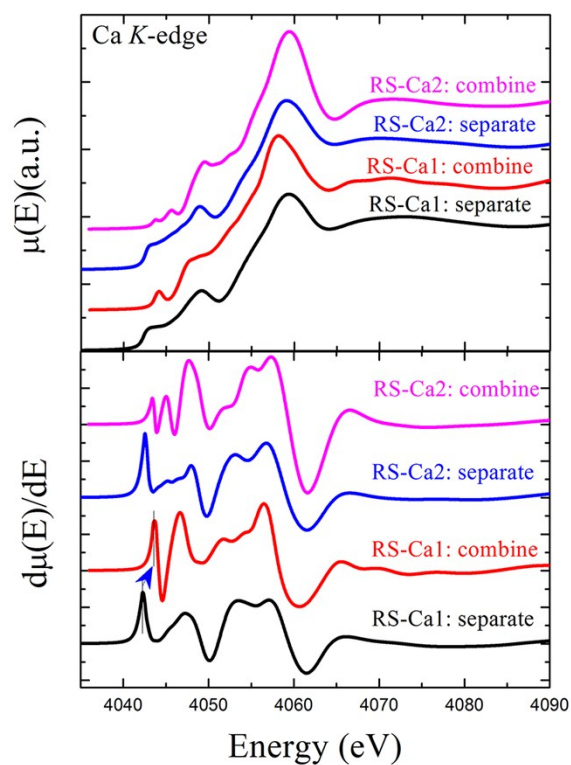

Figure S1 Theoretical XANES calculations at the Ca *K*-edge (upper panel) and its first derivative (lower panel) using either combined ( $\text{Ca}_3\text{Co}_4\text{O}_9$ ) or separate ( $\text{Ca}_2\text{CoO}_3$ ) structural models.

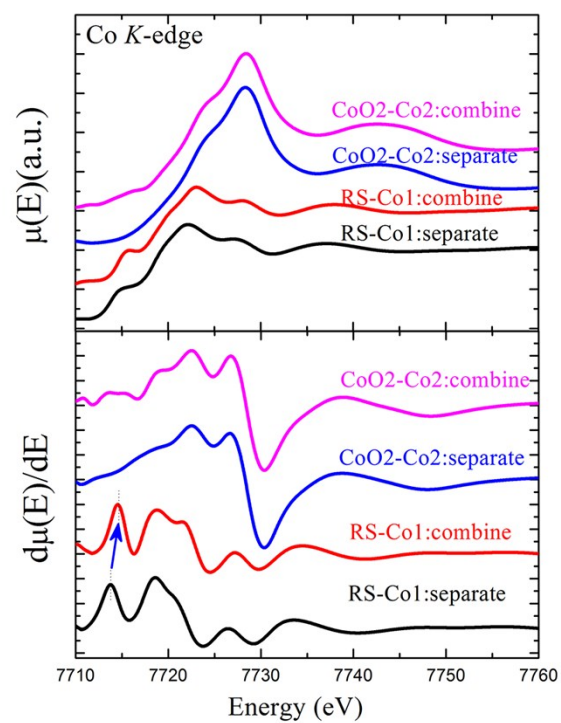

Figure S2 Theoretical XANES calculations at the Co *K*-edge (upper panel) and its first derivative (lower panel) using either combined ( $\text{Ca}_3\text{Co}_4\text{O}_9$ ) or separate ( $\text{Ca}_2\text{CoO}_3$  and  $\text{CoO}_2$ ) structural models.

(2) Theoretical polarized XANES calculations of this layered structure at the Ca and Co

*K*-edge and their derivative spectra.

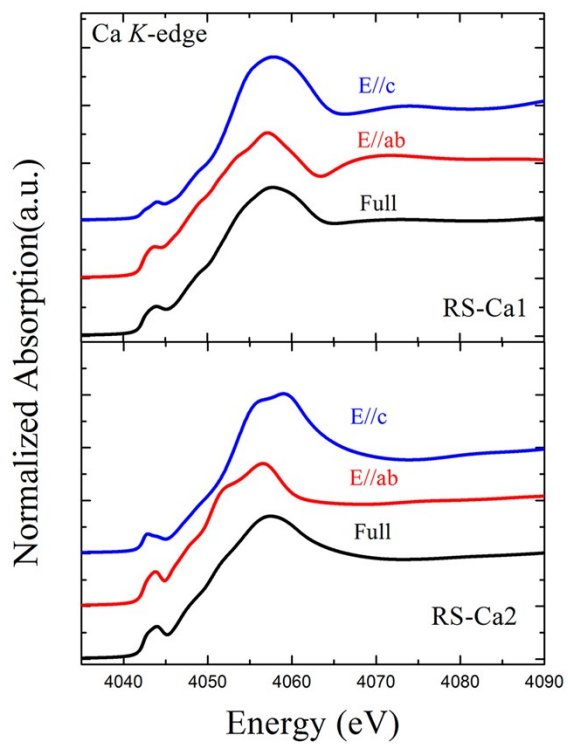

Figure S3 Comparison of polarized XANES spectra at the Ca *K*-edge for the two inequivalent calcium sites.

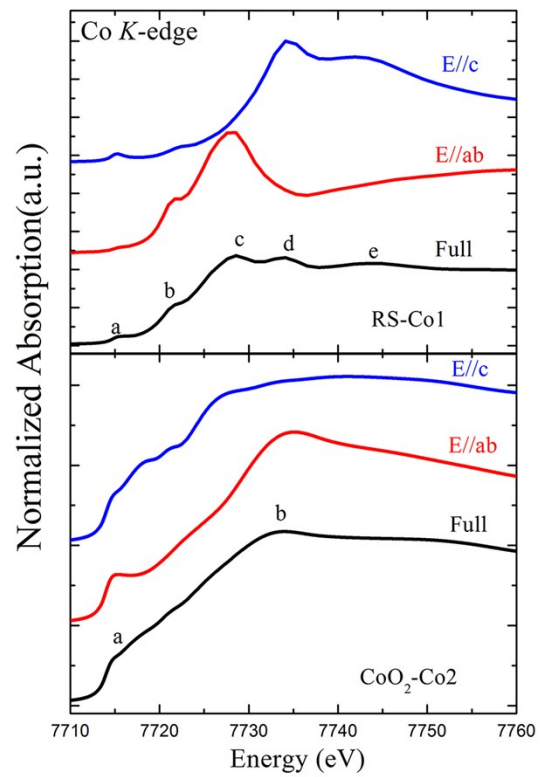

Figure S4 Comparison of polarized XANES spectra at the Ca K-edge for the two inequivalent cobalt sites.

### (3) Total energy calculations

Table S1 Total energy and optimized lattice parameters for different models of pure and doped  $\text{Ca}_8\text{Co}_{10}\text{O}_{24}$  by DFT

| Super cells                              | Content | Total energy (eV) | a     | b      | c      | $\delta a/a_0$ | $\delta b/b_0$ | $\delta c/c_0$ | $\delta E/\text{at.}$ |
|------------------------------------------|---------|-------------------|-------|--------|--------|----------------|----------------|----------------|-----------------------|
| $\text{Ca}_8\text{Co}_{10}\text{O}_{24}$ | 0       | -569.298905       | 4.858 | 17.595 | 10.837 | 0              | 0              | 0              | 0                     |
| Fe@Co1 in RS slab                        | 10%     | -571.190840       | 4.866 | 17.600 | 10.802 | 0.00165        | 2.84172E-4     | -0.00323       | -18.91935             |
| Fe@Co2 in $\text{CoO}_2$ slab            | 10%     | -570.523142       | 4.870 | 17.586 | 10.822 | 0.00247        | -5.11509E-4    | -0.00138       | -12.24237             |
| Fe@Ca1 in RS slab                        | 12.5%   | -572.220307       | 4.869 | 17.477 | 10.780 | 0.00226        | -0.00671       | -0.00526       | -23.37122             |
| Fe@Ca2 in RS slab                        | 12.5%   | -571.450338       | 4.893 | 17.448 | 10.775 | 0.0072         | -0.00835       | -0.00572       | -17.21146             |

(4) Band structure

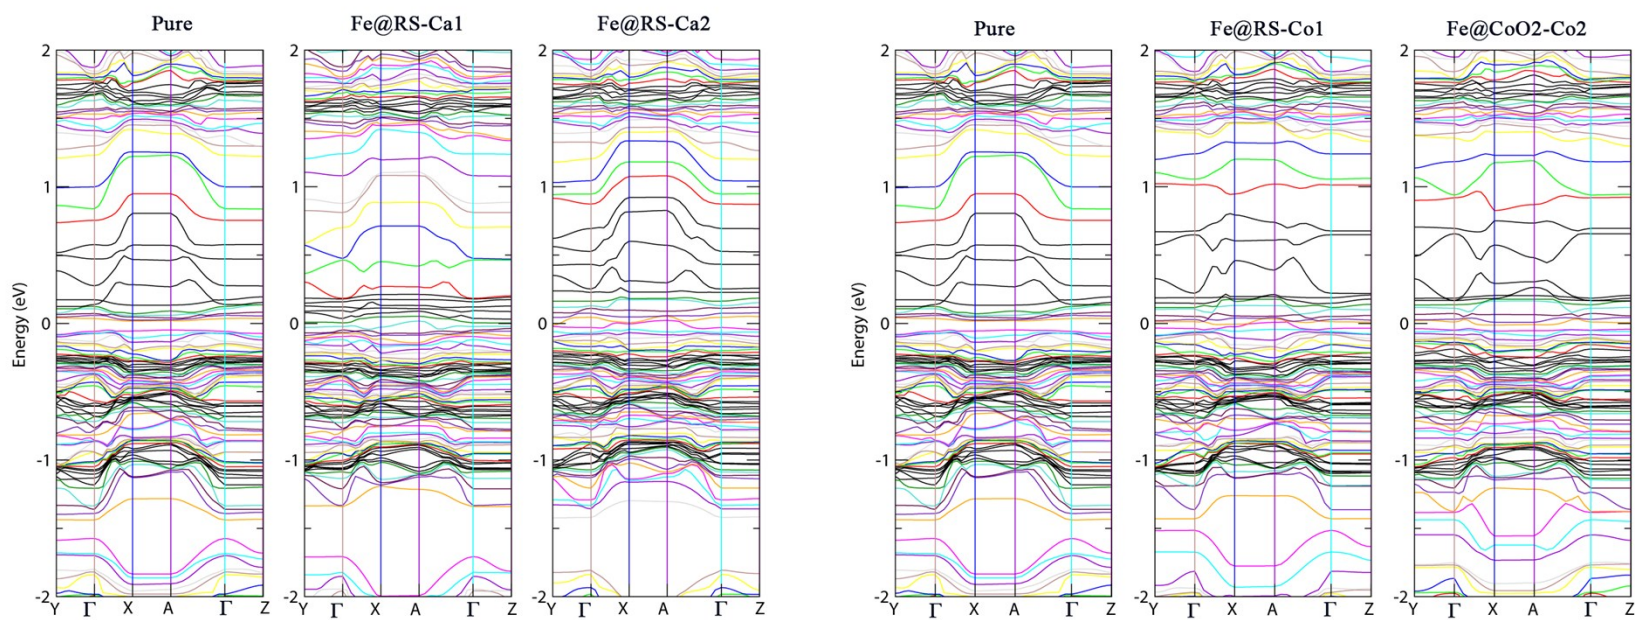

Figure S5 Comparison of band structure calculations for pristine and Fe doped  $\text{Ca}_3\text{Co}_4\text{O}_9$
